# Supplementary material
Source: PubMed Central journal article supplement (PMC380997)
Supplement: 7600085s2.pdf [file 7600085s2.pdf]

Figure S2

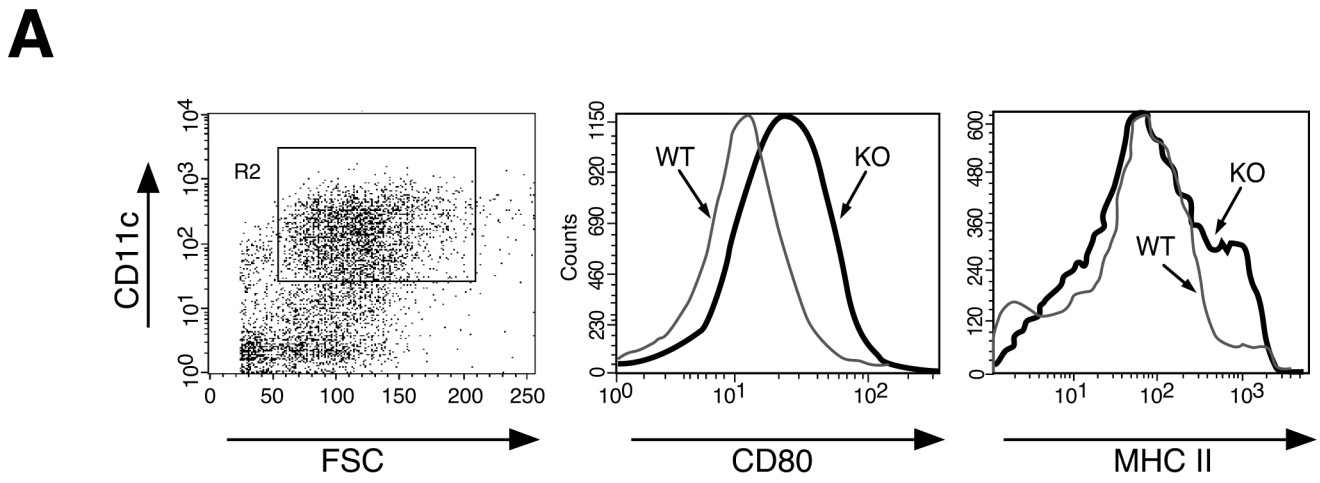

**B**

|              | WT   |      | KO   |             |
|--------------|------|------|------|-------------|
| LPS          | -    | +    | -    | +           |
| M2/M1 ratio: | 0.26 | 0.72 | 0.28 | <b>2.70</b> |

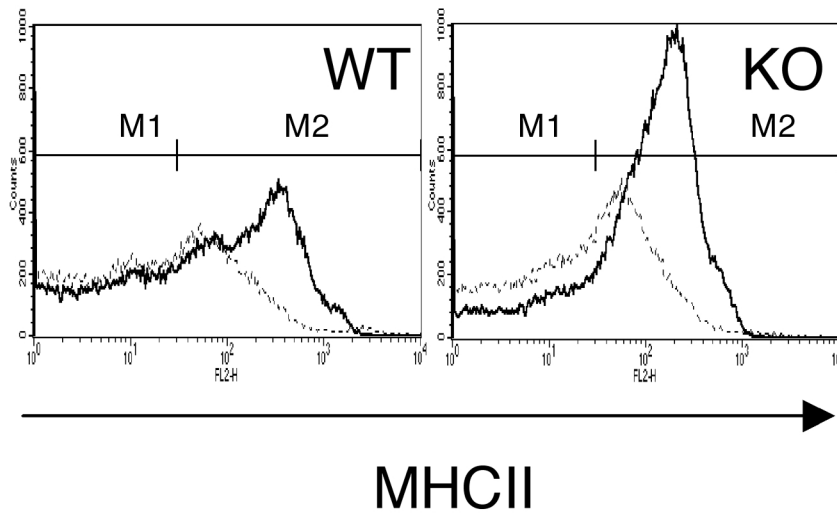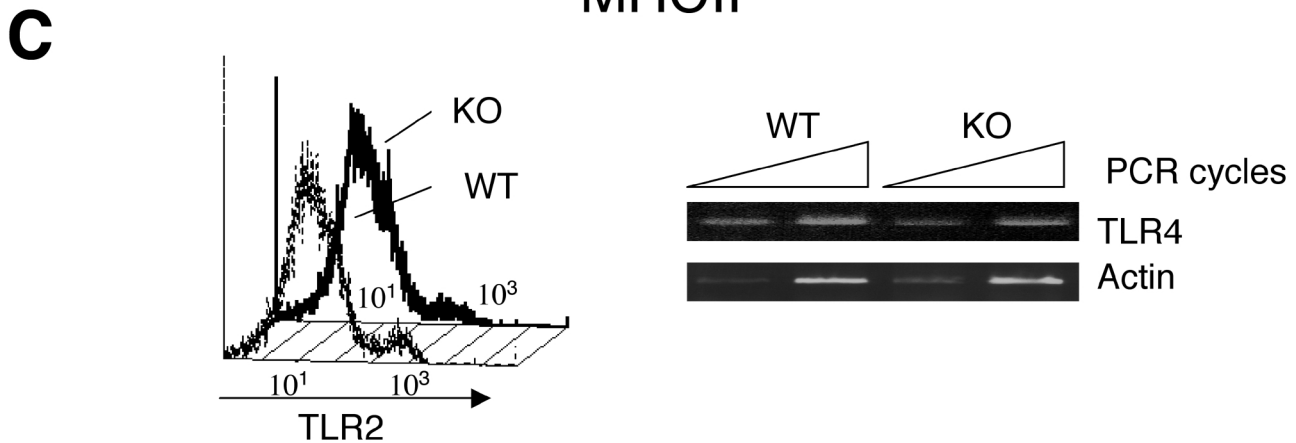

**Figure. S2.** Enhanced maturation of Runx3 KO BMDC and similar expression of TLR2 and TLR4 in WT and KO DC. **(A)** Day 11 BMDC from cultures not treated with LPS were gated as high forward scatter/CD11c<sup>+</sup> cells (R2) and assessed for expression of CD80 and MHC II. Bold lines, Runx3 KO; thin lines, WT littermates. Enhanced spontaneous maturation of the KO DC is evidenced by a larger proportion of cells with high CD80 and MHC II. **(B)** Day 7 WT and KO BMDC were grown in the presence of TGF- $\beta$  (10 ng/ml) and treated (bold line) or untreated (broken line) for 4h with LPS (1 $\mu$ g/ml) prior to FACS analysis with anti CD11c and anti MHCII. The ratio of mature MHCII<sup>high</sup> (M2) DC to immature MHCII<sup>low</sup> (M1) is indicated above the histogram. Note that TGF- $\beta$  inhibited maturation of WT BMDC as early as 4h after LPS treatment, but failed to do so in the KO BMDC **(C)** Expression of TLR2 (left) and TLR4 (right). TLR2, isolated WT and KO splenocytes were stained with anti CD11c and anti TLR2 (PE conjugated, clone 6C2, 12-9021, eBioscience) and analyzed by FACS. CD11c<sup>+</sup> DC were gated and level of TLR2 expression was measured. TLR4, day 7 WT and KO BMDC were treated for 16h with LPS (1 $\mu$ g/ml) before RNA extraction and RT-PCR analysis as described in Figure 3D. *TLR4* was determined at 25 and 27 cycles with the primers, F: CCTGCATAGAGGTAGTTCCTA; R: TAAGCCATGCCATGCCTTG yielding a 220bp fragment.
