# Supplementary material
Source: PubMed Central journal article supplement (PMC380997)
Supplement: 7600085s3.pdf [file 7600085s3.pdf]

Figure S3

**A**

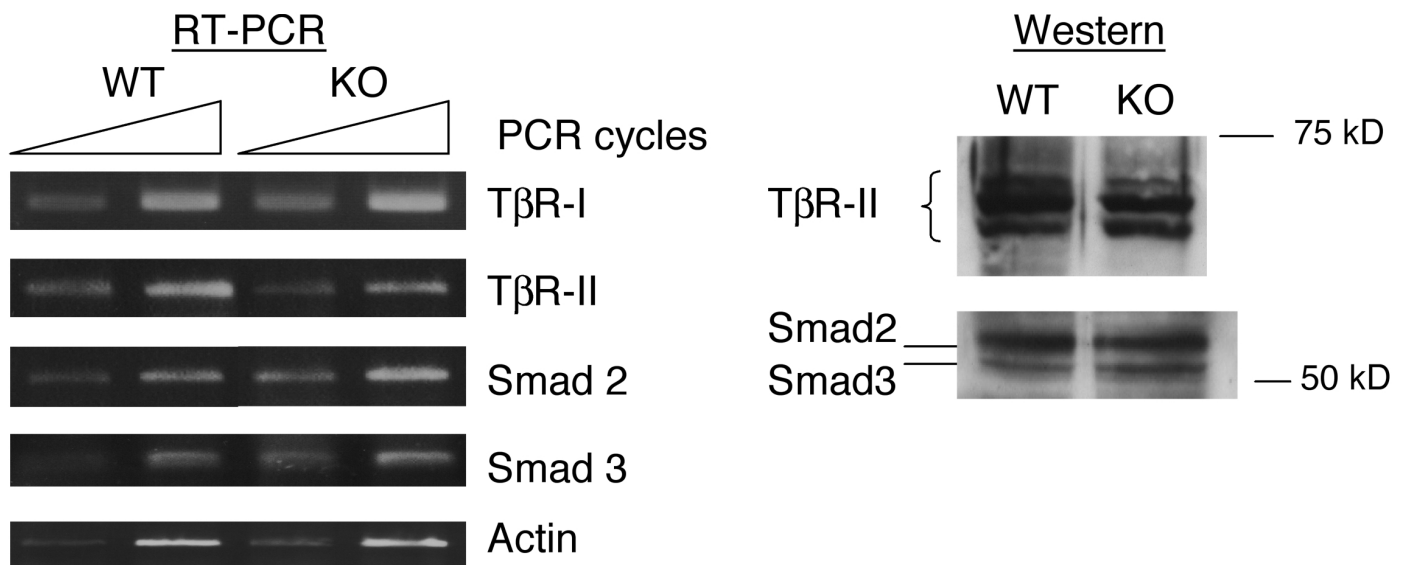

**B**

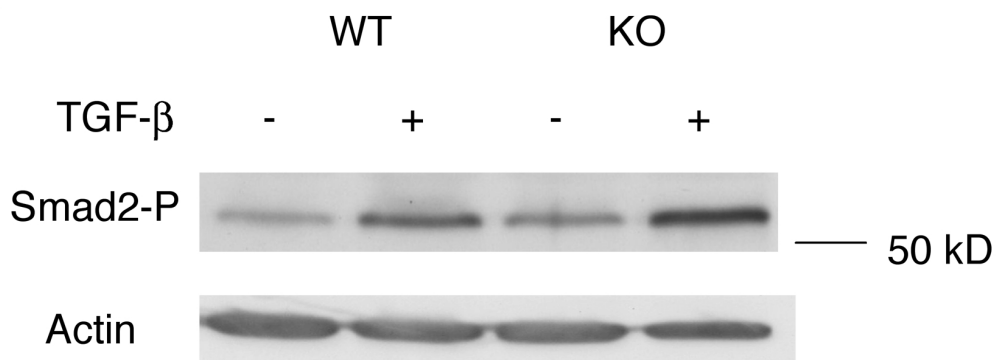

**Figure S3.** Expression of TGF- $\beta$  receptors (T $\beta$ R-I and T $\beta$ R-II) and signal transducers (Smad2 and Smad3) in WT and KO BMDC. **(A)** RT-PCR (left). Day 7 WT and KO BMDC were treated with LPS (1 $\mu$ g/ml), for 16h before RNA was extracted and analyzed by semiquantitative RT-PCR. Equal amounts of cDNA (compared to Actin) were used for PCR and # of cycles was pre-optimized for each pair of primers. The following primers were used at the indicated # of PCR cycles:

T G F  $\beta$  R1: F: CGAAGGCATTACAGTGTTTCTG; R: GAAAGGGCGATCTAGTGATGG, 29, 31 cycles yielding a 430bp fragment.  
T G F  $\beta$  R2: F: AAGTCCTGCATGAGCAACTGC; R: ACACGGTAGCAGTAGAAGATG; 23, 25 cycles yielding a 380bp fragment.  
S m a d 2: F: A A A A T G T C G T C C A T C T T G C C ; R: GAGTCATGATGGCTGTGAA, 23, 25 cycles yielding a 434bp fragment.  
S m a d 3: F: A C A A G G T C C T C A C C C A G A T G ; R: TGGCGATACACCACCTGTTA, 28, 30 cycles yielding a 319bp fragment.  
A c t i n: F: G A T G A C G A T A T C G C T G C G C T G ; R: GTACGACCAGAGGCATACAGG, 15, 16 cycles yielding a 439bp fragment.

Western (right). Day 7 WT and KO BMDC were treated with LPS (1 $\mu$ g/ml), for 16h before extraction of protein for blot analysis with anti T $\beta$ R-II antibodies (L-21) and anti Smad2/3 antibodies (E-20) (Santa Cruz Biotechnology, CA USA).

**(B)** TGF- $\beta$  dependent phosphorylation of Smad2 in BMDC. Western blot of proteins extracted from day 7 WT and KO BMDC incubated for 16h with LPS (1 $\mu$ g/ml) and treated or untreated with TGF- $\beta$  (10ng/ml) for 4h before protein extraction. Blots were reacted with Smad2-P antibodies (anti phospho-Smad2 antibodies specific for the phosphorylated C-terminal tail in Smad2 (Persson *et al.*, 1998), a gift of Peter ten Dijke The Netherlands Cancer Institute, Amsterdam) and with monoclonal anti  $\beta$  Actin clone AC-15 (Sigma, USA).
